# Supplementary material
Source: Springer Nature journal article supplement (https://www.springermedizin.de/resource/supplementary/12885_2012_3507_MOESM4_ESM.pdf/9463548)

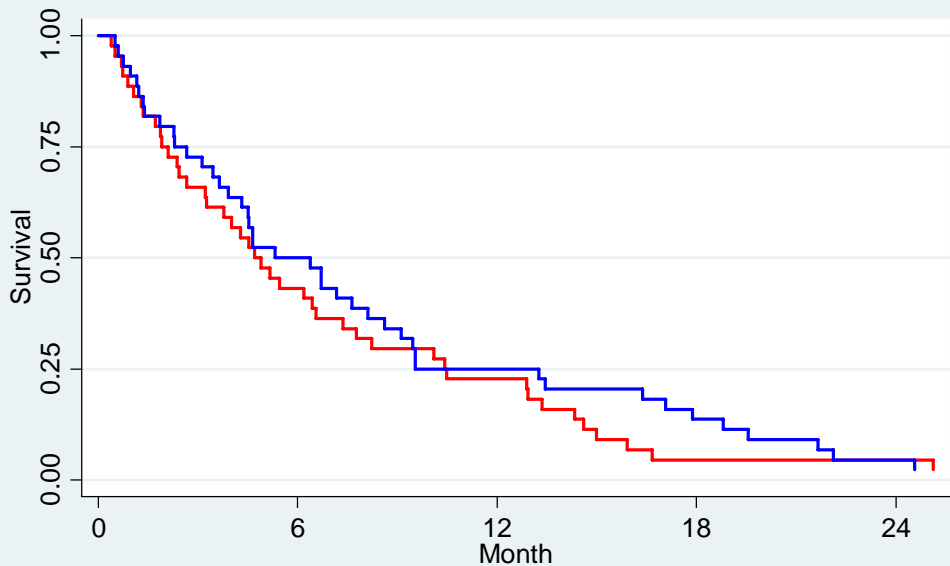

Number at risk

|        |    |    |    |   |   |
|--------|----|----|----|---|---|
| ≤ 2 cm | 44 | 19 | 10 | 2 | 2 |
| > 2 cm | 44 | 22 | 11 | 6 | 2 |

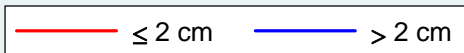

Supplement: MOESM4 [file 9463548]
